# Supplementary material
Source: PubMed Central journal article supplement (PMC5469591)
Supplement: supp_the2016-0245_onco12132-sup-0001-suppinfo1.pdf [file supp_the2016-0245_onco12132-sup-0001-suppinfo1.pdf]

Supplemental Appendix for:  
Quality and Availability of psycho-oncological Services: The physician's Perspective  
Markus Haun et al.

**APPENDIX S1. Self-report questionnaire on accessibility, availability, and potential benefits of psycho-oncology services**

**Instruction:** We would like to know, if and how psycho-social support is available for cancer patients you see in your office. Therefore, we kindly ask you to answer the following questions by selecting either yes or no.

| No. | Item                                                                                                                                                                                                                                                              | Yes                                                                                                                                                                                                                                                | No                                                                                                                                                                                                                                                 |
|-----|-------------------------------------------------------------------------------------------------------------------------------------------------------------------------------------------------------------------------------------------------------------------|----------------------------------------------------------------------------------------------------------------------------------------------------------------------------------------------------------------------------------------------------|----------------------------------------------------------------------------------------------------------------------------------------------------------------------------------------------------------------------------------------------------|
| 1   | Referral of psycho-socially burdened cancer patients to appropriate and prompt treatment is usually unproblematic.                                                                                                                                                | <input type="checkbox"/> <sub>1</sub>                                                                                                                                                                                                              | <input type="checkbox"/> <sub>0</sub>                                                                                                                                                                                                              |
| 2   | Referral is problematic to<br>a. psychotherapists<br>b. counseling services for general and psycho-social concerns<br>c. counseling services specialized in psycho-oncology<br>d. counseling services for legal concerns<br>e. peer support groups<br>f. hospices | <input type="checkbox"/> <sub>1</sub><br><input type="checkbox"/> <sub>1</sub><br><input type="checkbox"/> <sub>1</sub><br><input type="checkbox"/> <sub>1</sub><br><input type="checkbox"/> <sub>1</sub><br><input type="checkbox"/> <sub>1</sub> | <input type="checkbox"/> <sub>0</sub><br><input type="checkbox"/> <sub>0</sub><br><input type="checkbox"/> <sub>0</sub><br><input type="checkbox"/> <sub>0</sub><br><input type="checkbox"/> <sub>0</sub><br><input type="checkbox"/> <sub>0</sub> |
| 3   | Psycho-social care is a reasonable addition to somatic treatment.                                                                                                                                                                                                 | <input type="checkbox"/> <sub>1</sub>                                                                                                                                                                                                              | <input type="checkbox"/> <sub>0</sub>                                                                                                                                                                                                              |
| 4   | Patients benefit from psycho-social care.                                                                                                                                                                                                                         | <input type="checkbox"/> <sub>1</sub>                                                                                                                                                                                                              | <input type="checkbox"/> <sub>0</sub>                                                                                                                                                                                                              |
| 5   | There are a sufficient number of psycho-social services for cancer patients in the area surrounding my practice.                                                                                                                                                  | <input type="checkbox"/> <sub>1</sub>                                                                                                                                                                                                              | <input type="checkbox"/> <sub>0</sub>                                                                                                                                                                                                              |
| 6   | I refer cancer patients to psycho-social services.                                                                                                                                                                                                                | <input type="checkbox"/> <sub>1</sub>                                                                                                                                                                                                              | <input type="checkbox"/> <sub>0</sub>                                                                                                                                                                                                              |
| 7   | Patients get appointments with psycho-social services within seven days.                                                                                                                                                                                          | <input type="checkbox"/> <sub>1</sub>                                                                                                                                                                                                              | <input type="checkbox"/> <sub>0</sub>                                                                                                                                                                                                              |
| 8   | Patients usually wait longer than three weeks until an appointment.                                                                                                                                                                                               | <input type="checkbox"/> <sub>1</sub>                                                                                                                                                                                                              | <input type="checkbox"/> <sub>0</sub>                                                                                                                                                                                                              |
| 9   | Psycho-social services are also open to caregivers and family members.                                                                                                                                                                                            | <input type="checkbox"/> <sub>1</sub>                                                                                                                                                                                                              | <input type="checkbox"/> <sub>0</sub>                                                                                                                                                                                                              |
| 10  | I have obtained a supplementary psycho-social qualification in addition to my medical training.                                                                                                                                                                   | <input type="checkbox"/> <sub>1</sub>                                                                                                                                                                                                              | <input type="checkbox"/> <sub>0</sub>                                                                                                                                                                                                              |
| 11  | I have obtained a certified psycho-oncological qualification.                                                                                                                                                                                                     | <input type="checkbox"/> <sub>1</sub>                                                                                                                                                                                                              | <input type="checkbox"/> <sub>0</sub>                                                                                                                                                                                                              |
| 12  | I offer psycho-social support to cancer patients.                                                                                                                                                                                                                 | <input type="checkbox"/> <sub>1</sub>                                                                                                                                                                                                              | <input type="checkbox"/> <sub>0</sub>                                                                                                                                                                                                              |
